# Supplementary material for: Aberrant Promoter Hypomethylation of Sortilin 1: A Moyamoya Disease Biomarker
Source: PubMed Central journal article supplement — J Stroke. 2018 Sep 30;20(3):350–61. doi: 10.5853/jos.2018.00962 (PMC6186926; doi:10.5853/jos.2018.00962), 2018-09-30
Supplement: jos-2018-00962-suppl1.pdf [file jos-2018-00962-suppl1.pdf]

**Supplementary Table 1.** Demographic information of moyamoya disease patients and normal controls

| Case no.                         | Sex | Age (yr) | Symptoms                             | Suzuki grade (rt/lt) | Infarct                        | RNF213 c.14576G>A variant | Use                  |
|----------------------------------|-----|----------|--------------------------------------|----------------------|--------------------------------|---------------------------|----------------------|
| <b>Moyamoya disease patients</b> |     |          |                                      |                      |                                |                           |                      |
| MMD1                             | F   | 4        | Headache, TIA (rt)                   | 2/3                  | Borderzone infarct             | G/A                       | EA, MA, RT, BSP      |
| MMD2                             | F   | 17       | TIA (lt)                             | 3/2                  | None                           | A/A                       | EA, MA, RT, BSP      |
| MMD3                             | M   | 6        | TIA (lt)                             | 3/2                  | None                           | G/A                       | EA, MA, RT, BSP      |
| MMD4                             | M   | 1        | Seizure, hemiparesis (rt)            | 2/3                  | Lobar infarct                  | G/G                       | RT, PS1              |
| MMD5                             | F   | 10       | Headache, involuntary movement (lt)  | 3/4                  | Lobar infarct                  | G/G                       | RT, PS1              |
| MMD6                             | M   | 1        | Seizure, hemiparesis (lt)            | 2/2                  | Lobar infarct, chronic infarct | G/G                       | RT, PS1              |
| MMD7                             | F   | 8        | TIA (rt)                             | 3/2                  | None                           | G/A                       | RT, PS1              |
| MMD8                             | F   | 13       | Headache                             | 2/2                  | None                           | G/G                       | RT, PS2              |
| MMD9                             | F   | 11       | Headache, lower extremity TIA (both) | 4/4                  | Borderzone infarct             | G/A                       | RT, PS2              |
| MMD10                            | F   | 14       | TIA (lt)                             | 4/3                  | None                           | G/A                       | RT, PS1              |
| MMD11                            | F   | 10       | TIA (rt)                             | 4/4                  | None                           | G/A                       | RT, PS1              |
| MMD12                            | M   | 7        | Headache, TIA (lt)                   | 3/3                  | None                           | G/G                       | PS1                  |
| MMD13                            | M   | 6        | TIA (rt)                             | 1/3                  | Hemorrhagic infarct            | G/G                       | PS1                  |
| MMD14                            | M   | 5        | TIA (lt)                             | 3/2                  | None                           | G/A                       | PS2                  |
| MMD15                            | M   | 9        | Hemiparesis (lt)                     | 3/3                  | Lobar infarct                  | G/A                       | PS2                  |
| MMD16                            | F   | 4        | TIA (lt)                             | 3/2                  | None                           | G/G                       | PS2                  |
| MMD17                            | M   | 8        | TIA (rt)                             | 1/3                  | None                           | G/G                       | PS2                  |
| MMD18                            | F   | 4        | Hemiparesis (rt)                     | 2/4                  | Lobar infarct                  | G/G                       | PS2                  |
| <b>Normal controls</b>           |     |          |                                      |                      |                                |                           |                      |
| N1                               | F   | 23       |                                      |                      |                                | G/G                       | EA, MA, RT, BSP      |
| N2                               | M   | 21       |                                      |                      |                                | G/G                       | EA, MA, RT, BSP, PS1 |
| N3                               | M   | 28       |                                      |                      |                                | G/G                       | RT                   |
| N4                               | F   | 23       |                                      |                      |                                | G/G                       | RT, PS2              |
| N5                               | M   | 24       |                                      |                      |                                | G/G                       | RT, PS1              |
| N6                               | M   | 24       |                                      |                      |                                | G/G                       | RT, PS1              |
| N7                               | F   | 26       |                                      |                      |                                | G/G                       | RT, PS1              |
| N8                               | M   | 25       |                                      |                      |                                | G/G                       | RT, PS1              |
| N9                               | M   | 24       |                                      |                      |                                | G/G                       | RT, PS1              |
| N10                              | M   | 20       |                                      |                      |                                | G/A                       | RT, PS1              |
| N11                              | M   | 22       |                                      |                      |                                | G/G                       | RT, PS1              |
| N12                              | F   | 24       |                                      |                      |                                | G/G                       | PS2                  |
| N13                              | F   | 25       |                                      |                      |                                | G/G                       | PS2                  |
| N14                              | M   | 25       |                                      |                      |                                | G/G                       | PS2                  |
| N15                              | M   | 25       |                                      |                      |                                | G/G                       | PS2                  |
| N16                              | F   | 22       |                                      |                      |                                | G/G                       | PS2                  |

rt, right; lt, left; RNF213, ring finger protein 213; MMD, moyamoya disease; TIA, transient ischemic attack; G/A, heterozygote (genotype GA); A/A, homozygote (genotype AA); G/G, wild type (genotype GG); EA, expression array; MA, methylation array; RT, reverse-transcription quantitative polymerase chain reaction; BSP, bisulfite sequencing PCR; PS1, pyrosequencing analysis for validation of methylation status on the five candidate; PS2, pyrosequencing analysis for evaluation diagnostic ability of methylation status on *SORT1* gene as a biomarker for MMD; N, normal control.
