# Supplementary material for: Aberrant Promoter Hypomethylation of Sortilin 1: A Moyamoya Disease Biomarker
Source: PubMed Central journal article supplement — J Stroke. 2018 Sep 30;20(3):350–61. doi: 10.5853/jos.2018.00962 (PMC6186926; doi:10.5853/jos.2018.00962), 2018-09-30
Supplement: jos-2018-00962-suppl2.pdf [file jos-2018-00962-suppl2.pdf]

**Supplementary Table 2.** List of primers used for reverse-transcription quantitative polymerase chain reaction

| Gene          | Forward sequence (5'– 3') | Reverse sequence (5'– 3') |
|---------------|---------------------------|---------------------------|
| <i>APOD</i>   | GCATCCAGGCCAACTACTCACT    | GCTTCACCTTCGATTGATTAC     |
| <i>FAP</i>    | ACCTCTGCTGTGCTTGCCTTA     | CCTTCAGTGTGAGTGCTCTCATTG  |
| <i>LITAF</i>  | CATCCCCTTCTGCGTGGAT       | AAGCTGGATGAGAGGTGGAAAG    |
| <i>NUPR1</i>  | TCCTACCTCGGGCCTCTCAT      | CTTCTCTTGTGTGCGACCTTT     |
| <i>SORT1</i>  | CCGGGTCCGGGACTTC          | GCTATCTCCAACCCAGGACAAG    |
| <i>VEGFR1</i> | GAAAACGCATAATCTGGGACAGT   | GCGTGGTGTGCTTATTGGA       |
| <i>VEGFR2</i> | AACGTGTCACTTTGTGCAAGA     | TTCCATGAGACGGACTCAGAA     |
| <i>THBS1</i>  | TGCTATCACAACGGAGTTCAGT    | GCAGGACACCTTTTTCAGATG     |
| <i>THBS2</i>  | GACACGCTGGATCTCACCTAC     | GAAGCTGTCTATGAGGTCGCA     |
| <i>ANGPT1</i> | AGAACCTTCAAGGCTTGTTA      | GGTGGTAGCTCTGTTAATTGCT    |
| <i>ANGPT2</i> | ACCCCACTGTTGCTAAAGAAGA    | CCATCCTCACGTCGCTGAATA     |
| <i>PDGFB</i>  | CTCGATCCGCTCCTTTGATGA     | CGTTGGTGCGGTCTATGAG       |
| <i>MMP1</i>   | AAAATTACACGCCAGATTGCC     | GGTGTGACATTACTCCAGAGTTG   |
| <i>MMP2</i>   | GATACCCCTTTGACGGTAAGGA    | CCTTCTCCAAGGTCCATAGC      |
| <i>MMP3</i>   | CTGGACTCCGACACTCTGGA      | CAGGAAAGGTTCTGAAGTGACC    |
| <i>MMP9</i>   | TGTACCGCTATGGTTACTCG      | GGCAGGGACAGTTGCTTCT       |
| <i>VEGF</i>   | AGGGCAGAATCATCACGAAGT     | AGGGTCTCGATTGGATGGCA      |
| <i>FGF2</i>   | AGGGCAGAATCATCACGAAGT     | CGGTTAGCACACACTCCTTTG     |
| <i>GAPDH</i>  | AATCCCATCACCATCTTCCA      | TGGACTCCACGACGT ACTCA     |

*APOD*, apolipoprotein D; *FAP*, fibroblast activation protein alpha; *LITAF*, lipopolysacchride induced tumor necrosis factor- $\alpha$  factor; *NUPR1*, nuclear protein 1; *SORT1*, sortilin 1; *VEGFR*, vascular endothelial growth factor receptor; *THBS*, thrombospondin; *ANGPT*, angiopoietin; *PDGFB*, platelet derived growth factor subunit B; *MMP*, matrix metalloproteinase; *VEGF*, vascular endothelial growth factor; *FGF2*, fibroblast growth factor 2; *GAPDH*, glyceraldehyde 3-phosphate dehydrogenase.
