# Supplementary material for: Aberrant Promoter Hypomethylation of Sortilin 1: A Moyamoya Disease Biomarker
Source: PubMed Central journal article supplement — J Stroke. 2018 Sep 30;20(3):350–61. doi: 10.5853/jos.2018.00962 (PMC6186926; doi:10.5853/jos.2018.00962), 2018-09-30
Supplement: jos-2018-00962-suppl3.pdf [file jos-2018-00962-suppl3.pdf]

**Supplementary Table 3.** List of primers used for bisulfite sequencing polymerase chain reaction

| Gene         | Sequences (5'– 3')            | Strand  |
|--------------|-------------------------------|---------|
| <i>APOD</i>  | AGGTAGTTTTAGATGTAGAATTAGT     | Forward |
| <i>APOD</i>  | AAATATTTAAAAACATATTACAACAC    | Reverse |
| <i>FAP</i>   | TTATTGAGGAAGTAAATATTATGTATAAA | Forward |
| <i>FAP</i>   | ATCCTCAATAAATCTAAAAAAA        | Reverse |
| <i>LITAF</i> | GGGTATGTTATTTATTTTTTIGAGTT    | Forward |
| <i>LITAF</i> | AACCACATCATAATTCTACCCATCT     | Reverse |
| <i>NUPR1</i> | TGTTTGTTTTGTTTTTGGTTT         | Forward |
| <i>NUPR1</i> | AATATACTAATATCCCTCCCCCTC      | Reverse |
| <i>SORT1</i> | TTTGAGTTTGTTTAGTTGGAAAAGG     | Forward |
| <i>SORT1</i> | AACATCACATACTAAAACCAAACTTATC  | Reverse |

*APOD*, apolipoprotein D; *FAP*, fibroblast activation protein alpha; *LITAF*, lipopolysacchride induced tumor necrosis factor-alpha factor; *NUPR1*, nuclear protein 1; *SORT1*, sortilin 1.
