# Supplementary material for: Aberrant Promoter Hypomethylation of Sortilin 1: A Moyamoya Disease Biomarker
Source: PubMed Central journal article supplement — J Stroke. 2018 Sep 30;20(3):350–61. doi: 10.5853/jos.2018.00962 (PMC6186926; doi:10.5853/jos.2018.00962), 2018-09-30
Supplement: jos-2018-00962-suppl4.pdf [file jos-2018-00962-suppl4.pdf]

**Supplementary Table 4.** List of primers used for pyrosequencing analyses

| Gene         |                       | Primer (5'– 3')                               |
|--------------|-----------------------|-----------------------------------------------|
| <i>APOD</i>  | Forward               | AGATGAAGGTAGTTTTAGATGTAGA                     |
|              | Biotinylated-reverse  | AATAAACACAACATCCCATCTTTATA                    |
|              | Sequencing primer     | GTTTTGATGTTTATTTTTATGTAT                      |
|              | Sequences to analyze* | GTTAYGTTYGT <u>Y</u> GTTTTTA                  |
|              | Position              | GRCh38/hg38 [chr3:195,584,008–195,584,026]    |
| <i>FAP</i>   | Forward               | TTTGGTTTTAAATGAATTGTGAGTGAT                   |
|              | Biotinylated-reverse  | ACCCAATAACTTACTAAAATAATCCTTC                  |
|              | Sequencing primer     | ATTTTGTAAATTATTAATATTTG                       |
|              | Sequences to analyze* | TTTAYGTTG                                     |
|              | Position              | GRCh38/hg38 [chr2:162,243,611–162,243,619]    |
| <i>LITAF</i> | Forward               | GGGAGTGAATTGGGAAGATGGTA                       |
|              | Biotinylated-reverse  | AAATAAACTACTAATTTCCAAACTTACT                  |
|              | Sequencing primer     | ATTAGTAAGGTTTATTAGTTG                         |
|              | Sequences to analyze* | TTTGTTYGTTTTGTGTTTTAGGGTGGT <u>Y</u> GTGYGTTA |
|              | Position              | GRCh38/hg38 [chr16:11,587,597–11,587,635]     |
| <i>NUPR1</i> | Forward               | TTAGTTGGATATTTTTATAGAGGAGGTTT                 |
|              | Biotinylated-reverse  | AAATCCTACCTCTCCCTACTTT                        |
|              | Sequencing primer     | TAGTTGGATATTTTTATAGAG                         |
|              | Sequences to analyze* | GAGGTTYGTTTT <u>Y</u> GGTA                    |
|              | Position              | GRCh38/hg38 [chr16:28,539,190–28,539,208]     |
| <i>SORT1</i> | Forward               | TTGTAAGAAGGTGAATGAGAATTGATGTG                 |
|              | Biotinylated-reverse  | CTTTAACCTACCTCCCTCAA                          |
|              | Sequencing primer     | ATTTAAGGAGATAGATATTAGGAT                      |
|              | Sequences to analyze* | ATTYGTGATTTTTGTAAGTTGAAGAATAGTTTTTTATAYGTTT   |
|              | Position              | GRCh38/hg38 [chr1:109,398,539–109,398,583]    |

*APOD*, apolipoprotein D; *FAP*, fibroblast activation protein alpha; *LITAF*, lipopolysacchride induced tumor necrosis factor-alpha factor; *NUPR1*, nuclear protein 1; *SORT1*, sortilin 1.

\*The specific CpG sites used for data analysis are underlined.
