# Supplementary material for: Aberrant Promoter Hypomethylation of Sortilin 1: A Moyamoya Disease Biomarker
Source: PubMed Central journal article supplement — J Stroke. 2018 Sep 30;20(3):350–61. doi: 10.5853/jos.2018.00962 (PMC6186926; doi:10.5853/jos.2018.00962), 2018-09-30
Supplement: jos-2018-00962-suppl5.pdf [file jos-2018-00962-suppl5.pdf]

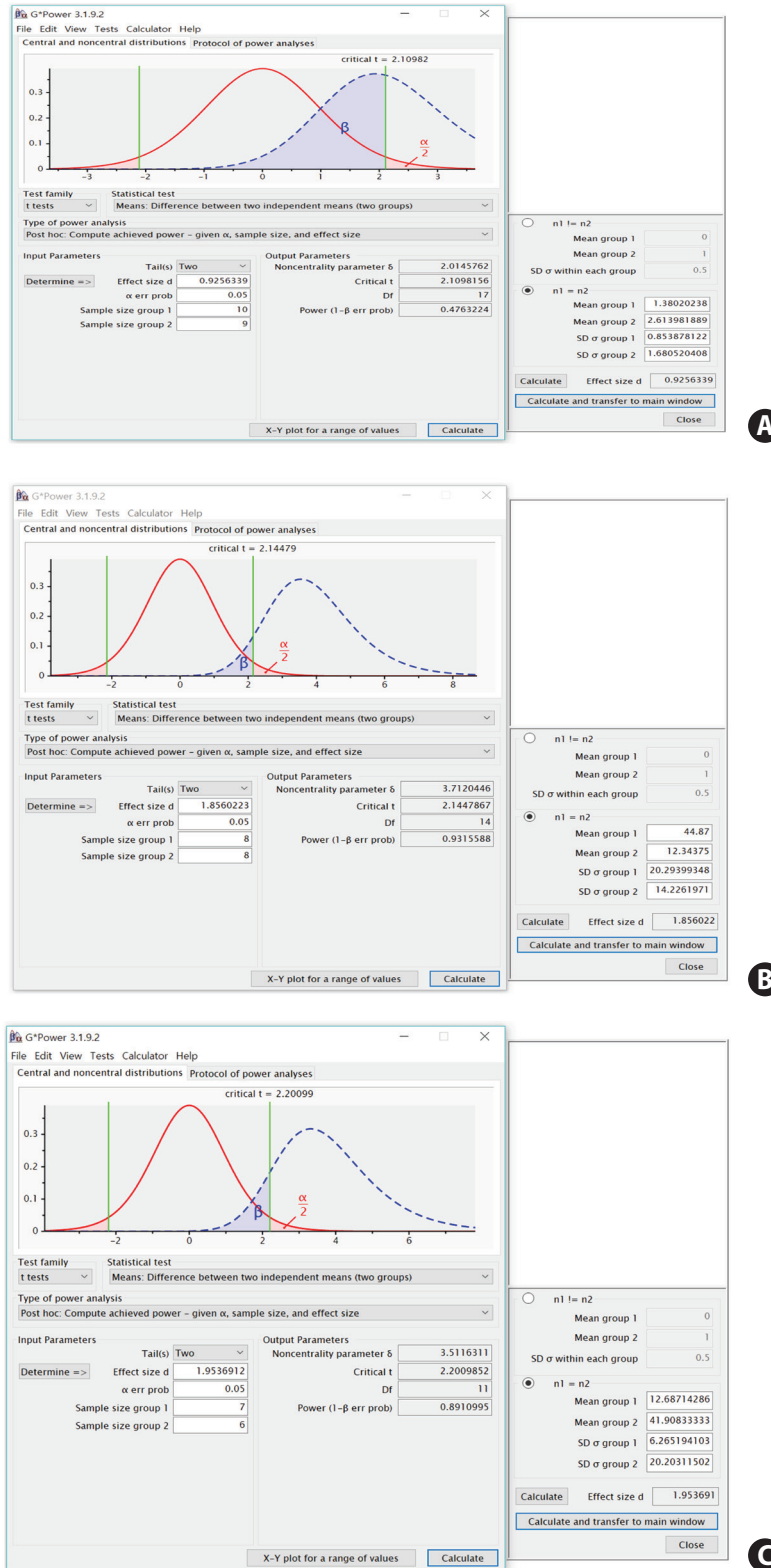

**Supplementary Figure 1.** The power of detecting a significant mean difference in methylation or mRNA expression of sortilin 1 (*SORT1*) gene between normal control and moyamoya disease (MMD) groups. To calculate the power to detect a meaningful difference in a given sample size, a *post hoc* power analysis was performed with G\*power 3.1 software (Heinrich-Heine-University Düsseldorf) using a two-tailed test with the significance level of 0.05, per convention. (A) A sample set with normal controls (n=10) and MMD patients (n=8) was used for validation of *SORT1* mRNA expression in endothelial colony forming cells (ECFCs). (B) A sample set with normal controls (n=8) and MMD patients (n=8) was used for validation of methylation status in the *SORT1* promoter in ECFCs. (C) A sample set with normal controls (n=6) and MMD patients (n=7) was used for further validation of methylation status of the *SORT1* promoter in ECFCs.
