# Supplementary material for: Aberrant Promoter Hypomethylation of Sortilin 1: A Moyamoya Disease Biomarker
Source: PubMed Central journal article supplement — J Stroke. 2018 Sep 30;20(3):350–61. doi: 10.5853/jos.2018.00962 (PMC6186926; doi:10.5853/jos.2018.00962), 2018-09-30
Supplement: jos-2018-00962-suppl6.pdf [file jos-2018-00962-suppl6.pdf]

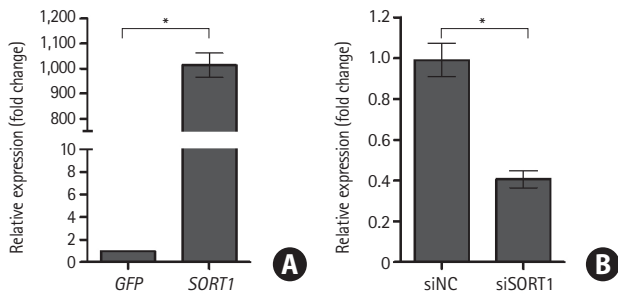

**Supplementary Figure 2.** Ectopic expression of sortilin 1 (*SORT1*) mRNA was confirmed by reverse transcription-quantitative polymerase chain reaction (RT-qPCR) following transient transfection. Human umbilical vein endothelial cells were transiently transfected with a pmaxGFP vector and pCMV6-XL5-SORT1 expression construct or with non-targeting control siRNA (siNC) and *SORT1* siRNA (siSORT1). Overexpression (A) or depletion (B) of *SORT1* mRNA was confirmed via RT-qPCR after a 24-hour transfection. Data are represented as mean±standard deviations for the three independent experiments. Statistical differences were determined via t-test. GFP, green fluorescent protein. \* $P < 0.001$ .
